# Supplementary material
Source: PubMed Central journal article supplement (PMC2819586)

Supplemental tables

**Table 1.** Botanical pesticides tested for Nrf2/ARE induction.

| Chemical          | Class           | Structure                                                                            | ARE activation |
|-------------------|-----------------|--------------------------------------------------------------------------------------|----------------|
| Anabasine         | Alkaloid        | 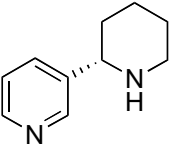    | No             |
| Angelicin         | Coumarin        |   | No             |
| Apiole            | Phenylpropanoid |  | No             |
| Aristolochic acid | Alkaloid        |  | No             |
| Asarone           | Phenolic ether  |  | No             |

Azadirachtin

Terpenoid

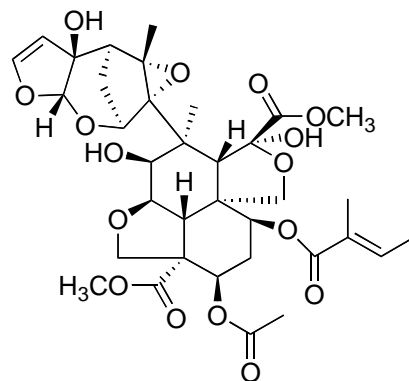

No

Canavanine

Peptide

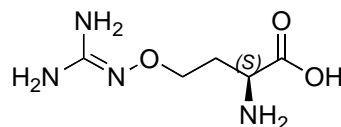

No

DEET

Amide

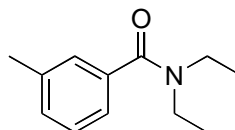

No

2,4-dinitrophenol

Phenol

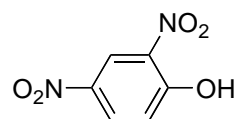

No

Eugenol

Phenol

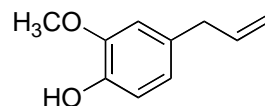

No

Farnesol

Sesquiterpene

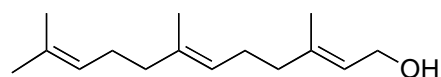

No

Flavone

Flavonoid

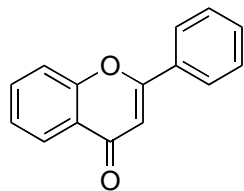

No

Fentin acetate

Organotin

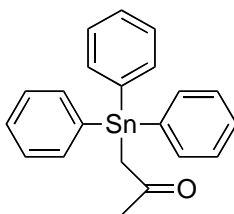

No

Gallic acid

Phenol

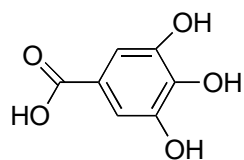

No

Halostachine

Alcohol

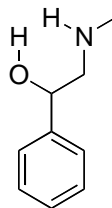

No

Juglone

Nafthoquinone

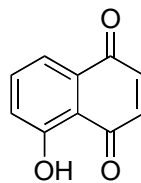

No

Indole

Alkaloid

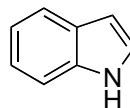

No

1-naphthaldehyde

Aldehyde

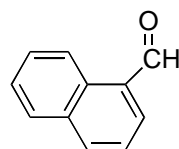

No

Phloretin

Flavonoid

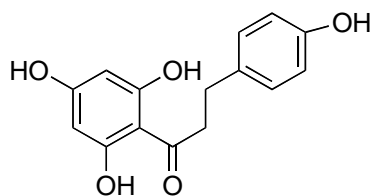

No

Piperine

Amide

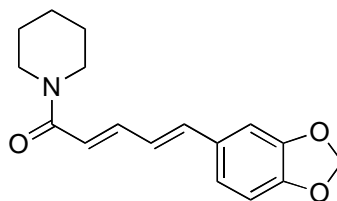

No

Precocene

Benzopyran

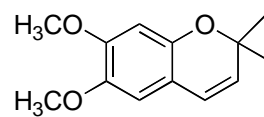

No

Plumbagin

Napthoquinone

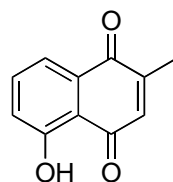

Yes

Resveratrol

Phenol

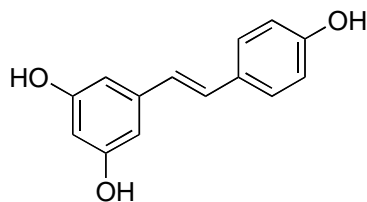

No

Rotenone

Flavonoid

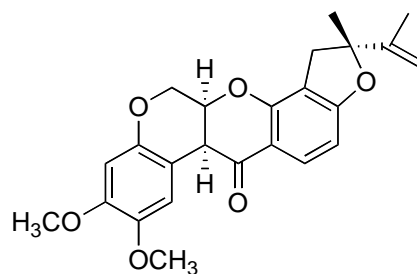

No

Sesamol Phenol  No

Sinigrin Glucoside 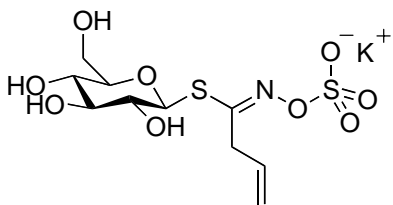 No

Sylimarin Flavonoid 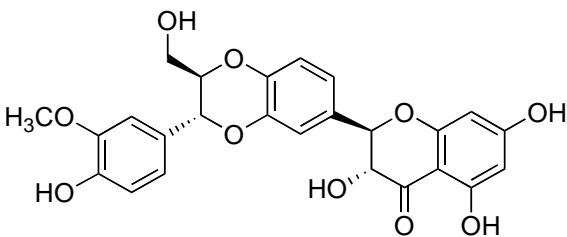 No

Visnagin Phenolic ether  No

Veratraldehyde Benzaldehyde  No

Veratrine Alkaloid 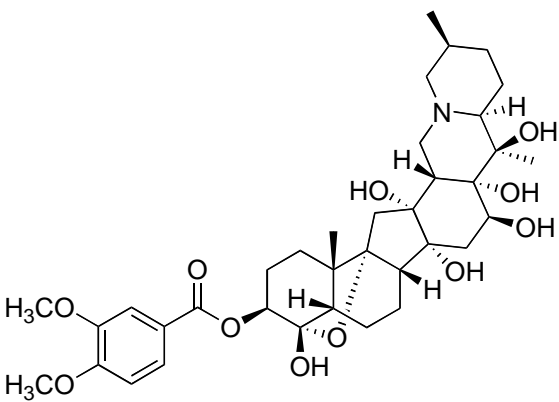 No

**Table 2.** Cerebral blood flow in mice subjected to ischemia reperfusion. Cerebral blood flow was measured in vehicle and plumbagin (PL) treated animals at the indicated time points before and after middle cerebral artery occlusion (MCAO). Data are mean and S.D. (n=5-6). \*p< 0.05 compared to vehicle I/R.

|                   | <b>Vehicle (%)</b> | <b>PL (%)</b> |
|-------------------|--------------------|---------------|
| Pre-MCAO          | 100                | 100           |
| MCAO 30 min       | 8.42 ± 3.1         | 10.7 ± 4.0    |
| Post-MCAO 15 min  | 158 ± 30.0         | 167 ± 26.8    |
| Post-MCAO 30 min  | 132 ± 15.6         | 148 ± 23.1    |
| Post-MCAO 60 min  | 74.6 ± 20.9        | 77.3 ± 17.6   |
| Post-MCAO 90 min  | 72.4 ± 14.1        | 69.5 ± 10.2   |
| Post-MCAO 120 min | 71.8 ± 14.8        | 88.6 ± 11.0   |
| Post-MCAO 180 min | 78.4 ± 14.0        | 95.0 ± 3.3*   |

Supplemental Figure 1. Plumbagin induces Nrf2-dependent genes in primary cultures. (A) Primary murine mixed (neurons and astrocytes) cultures were treated either with DMSO or the indicated concentrations of plumbagin. After 6 hrs the cells were fixed and processed for immunostaining using hPAP primary antibody, and Alexa Fluor 488-conjugated secondary antibody. Nuclei were counterstained with Hoechst. (B) Primary rat cortical neurons treated with vehicle (-) or the indicated concentrations of plumbagin for 24 hrs were assessed for viability by MTT assay. Data are presented as mean and S.D. (n=3). (C) Neuronal cultures treated with vehicle (-) or the indicated concentrations of plumbagin (PL) were subjected to glucose deprivation (GD) and cell viability assessed after 24 hrs. Data are mean and S.D. (n=3). \*, p<0.001 compared to control; #, p<0.01 compared to GD. (D) SH-SY5Y cells were transfected with ARE- firefly luciferase reporter and pRL-TK control vector, and either pEF (Control) or dominant negative Nrf2 (DN-Nrf2) constructs. 24 hrs post-transfection cells were treated with either vehicle (-) or 1  $\mu$ M plumbagin (PL). The relative light intensities were normalized, and signal averages were determined. Data are mean and S.D. (n=4-6). \*\*\*, p=0.0019 compared to vehicle; #, p=0.0018 compared to PL.

Supplemental Figure 2. Plumbagin cerebral bioavailability and effects on mean arterial pressure and heart rate. (A) Representative HPLC/ tandem mass spec chromatogram identifying plumbagin (PL) in brain extracts 1 hr post administration. Mean arterial pressure (B) and heart rate (C) were measured in vehicle and plumbagin treated animals pre- and post-occlusion as described. Data are mean and S.D. (n=5-6).

**A**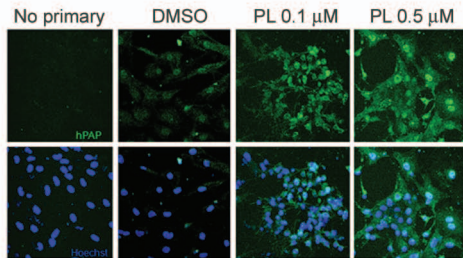**B**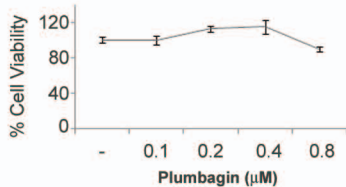**C**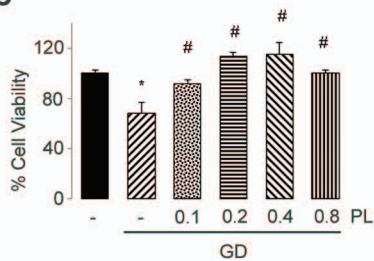**D**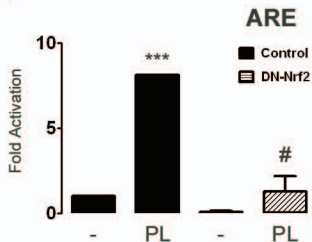



**A**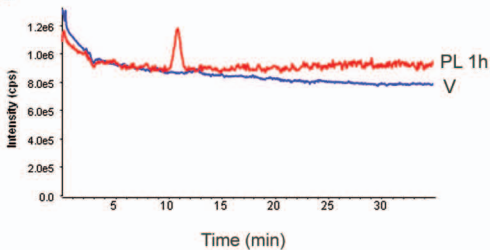**B**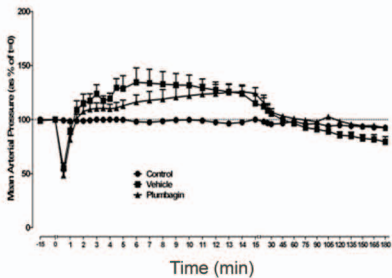**C**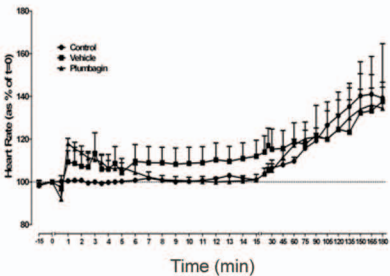

Supplement: NIHMS166741-supplement-Supp_Figs_and_Tables.pdf [file NIHMS166741-supplement-Supp_Figs_and_Tables.pdf]
